# Supplementary material for: Formaldehyde-Induced Aggravation of Pruritus and Dermatitis Is Associated with the Elevated Expression of Th1 Cytokines in a Rat Model of Atopic Dermatitis
Source: PLoS One. 2016 Dec 22;11(12):e0168466. doi: 10.1371/journal.pone.0168466 (PMC5179079; doi:10.1371/journal.pone.0168466)
Supplement: S1 Table — (XLSX) [file pone.0168466.s002.xlsx]

## Sheet: Sheet1
	S2 Table. Severity Index
	Face	0	Normal
		1	Wispy fur
		2	Alopecia or flare
		3	Bleeding or Scab
	Ears	0	Normal
		1	Flare
		2	Bleeding or Scab
		3	Loss of the tissue
	Back	0	Normal
		1	Wispy fur
		2	Alopecia or flare
		3	Bleeding or Scab
